# Supplementary material for: AvP: A software package for automatic phylogenetic detection of candidate horizontal gene transfers
Source: PubMed Central journal article supplement (PMC9678320; doi:10.1371/journal.pcbi.1010686), 2022-11-09
Supplement: pcbi.1010686.s001.pdf [file pcbi.1010686.s001.pdf]

## Comparing AvP results on *C. elegans* to Crisp et al., 2015

Genes defined as HGT in *C. elegans* by Crisp et al., 2015 [1] : 139

- Annotated as pseudogenes in WormBase : 3
- Deleted from Wormbase: 1

Genes tested with AvP : 135

- No HGT: 21 [with hits from both metazoan and non metazoan: 17]
- HGT: 98 [with hits from both metazoan and non metazoan: 18]
- Complex: 16

Table S1: Manual Inspection of the trees of the 51 genes containing both metazoan and non metazoan hits (N=No HGT; H=HGT; C=Complex)

| AvP result | Confirmed | $AI > 0$<br>$AHS > 0$ | $AI < 0$<br>$AHS > 0$ | $AI > 0$<br>$AHS < 0$ | $AI < 0$<br>$AHS < 0$ |
|------------|-----------|-----------------------|-----------------------|-----------------------|-----------------------|
| N=17       | N         |                       | 1                     | 2                     | 5                     |
|            | H         | 1*                    | 4*                    |                       |                       |
|            | C         |                       | 4†                    |                       |                       |
| C=16       | C         | 6                     | 1                     | 8                     | 1                     |
| H=18       | H         | 16                    | 1                     |                       |                       |
|            | C         |                       |                       | 1§                    |                       |

\* db error, nematode protein classified as non nematode metazoan

† possible independent hgt in another metazoan

§ db error, nematode protein classified as bacteria

After manual inspection

- No HGT: 12 [with hits from both metazoan and non metazoan: 8]
- HGT: 102 [with hits from both metazoan and non metazoan: 22]
- Complex: 21

## References

- [1] Crisp A, Boschetti C, Perry M, Tunnacliffe A, Micklem G. Expression of multiple horizontally acquired genes is a hallmark of both vertebrate and invertebrate genomes. *Genome Biology*. 2015;16(1):1–50. doi:10.1186/s13059-015-0607-3.
