# Supplementary material for: AvP: A software package for automatic phylogenetic detection of candidate horizontal gene transfers
Source: PubMed Central journal article supplement (PMC9678320; doi:10.1371/journal.pcbi.1010686), 2022-11-09
Supplement: pcbi.1010686.s002.pdf [file pcbi.1010686.s002.pdf]

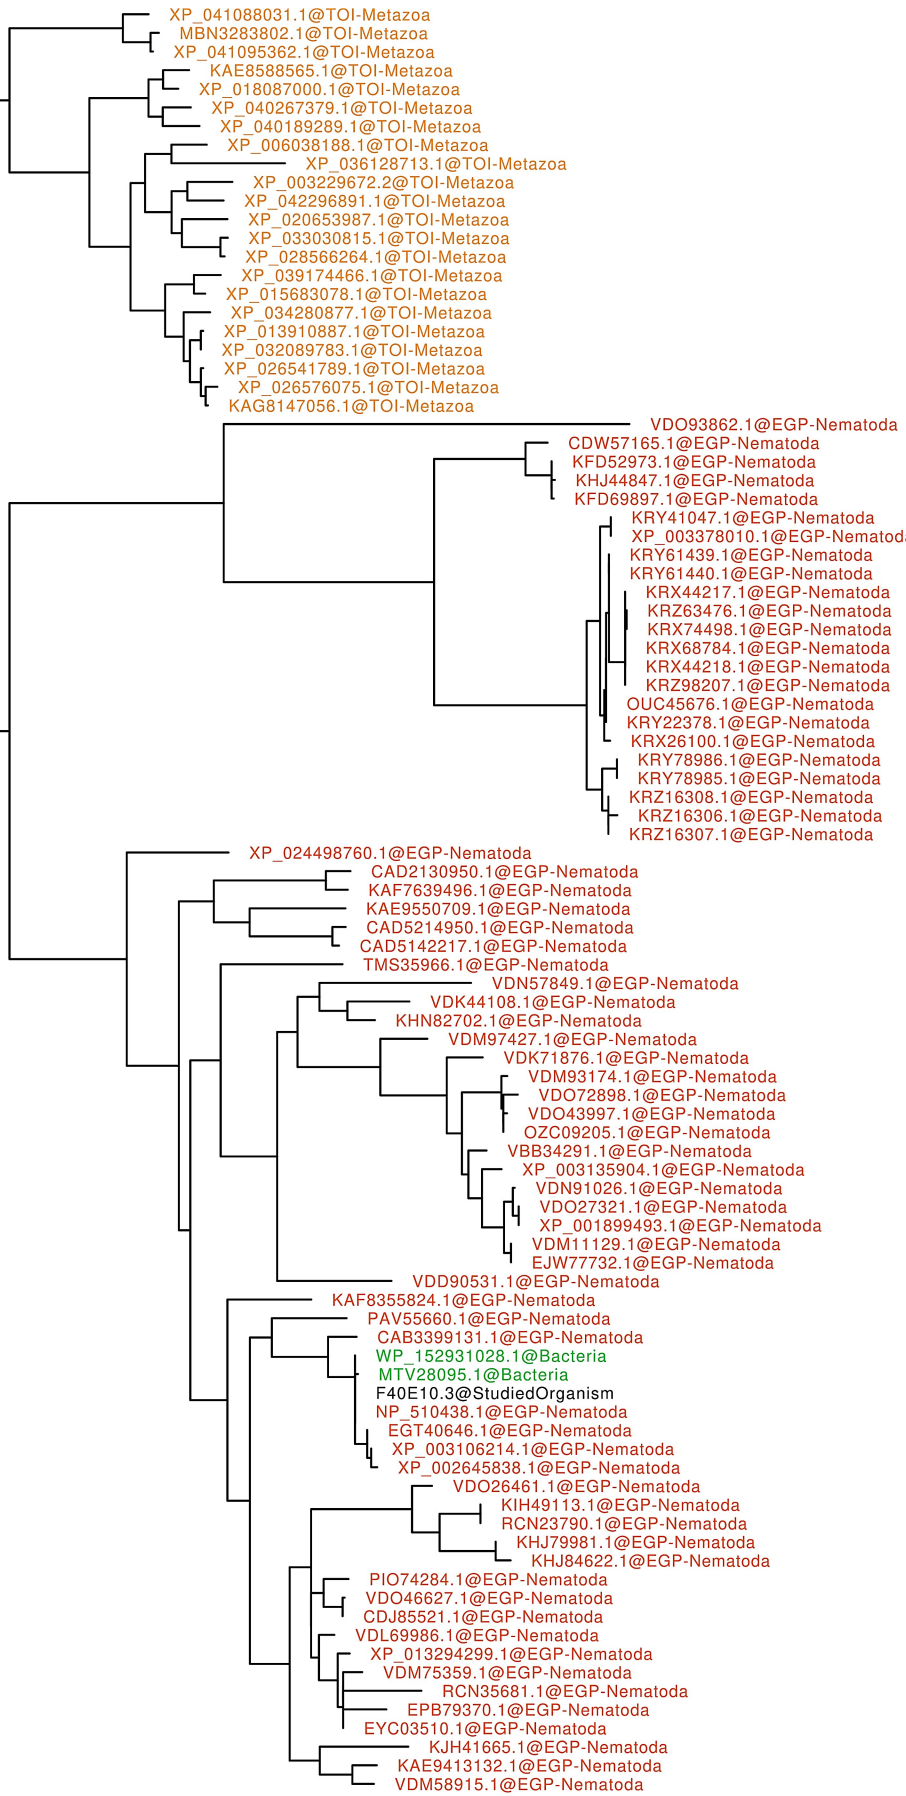

0.3
